# Supplementary material for: The self-assembly and pyridine regulation of a hydrogen-bonded dimeric building block formed by a low-symmetric aromatic carboxylic acid
Source: Royal Society of Chemistry journal article supplement (doi:10.1039/d1nr07840b), 2022-01-01
Supplement: d1nr07840b1.pdf [file d1nr07840b1.pdf]

Electronic Supplementary Information

## **The self-assembly and pyridine regulation of a hydrogen-bonded dimeric building block formed by low-symmetric aromatic carboxylic acid**

Siqi Zhang,<sup>a,b</sup> Chen Chen,<sup>b</sup> Jianqiao Li,<sup>b</sup> Chunyu Ma,<sup>b</sup> Xiaokang Li,<sup>b</sup> Wei Ma,<sup>d</sup> Min Zhang,<sup>\*a</sup> Faliang Cheng,<sup>\*a</sup> Ke Deng<sup>\*,b</sup> and Qingdao Zeng<sup>\*,b,c</sup>

<sup>a</sup>Guangdong Engineering and Technology Research Center for Advanced Nanomaterials, School of Environment and Civil Engineering, Dongguan University of Technology, Dongguan 523808, China.

<sup>b</sup>CAS Key Laboratory of Standardization and Measurement for Nanotechnology, CAS Center for Excellence in Nanoscience, National Center for Nanoscience and Technology (NCNST), Beijing 100190, China.

<sup>c</sup>Center of Materials Science and Optoelectronics Engineering, University of Chinese Academy of Sciences, Beijing 100049, China.

<sup>d</sup>State Key Laboratory for Mechanical Behavior of Materials, Xi'an Jiaotong University, Xi'an 710049, China.

**\*Corresponding author E-mail:** mindear@dgut.edu.cn (M. Z.); chengfl@dgut.edu.cn (F. C.); kdeng@nanoctr.cn (K. D.); zengqd@nanoctr.cn (Q. Z.).

Table of Contents:

|   |                                                                                        |    |
|---|----------------------------------------------------------------------------------------|----|
| 1 | DFT simulated single molecular models.....                                             | S3 |
| 2 | Supplementary examples of pyridine molecules co-assembled with H <sub>5</sub> BHB..... | S5 |
| 3 | Supplementary large scale (120 nm × 120 nm) STM images.....                            | S6 |

1 DFT simulated single molecular models.

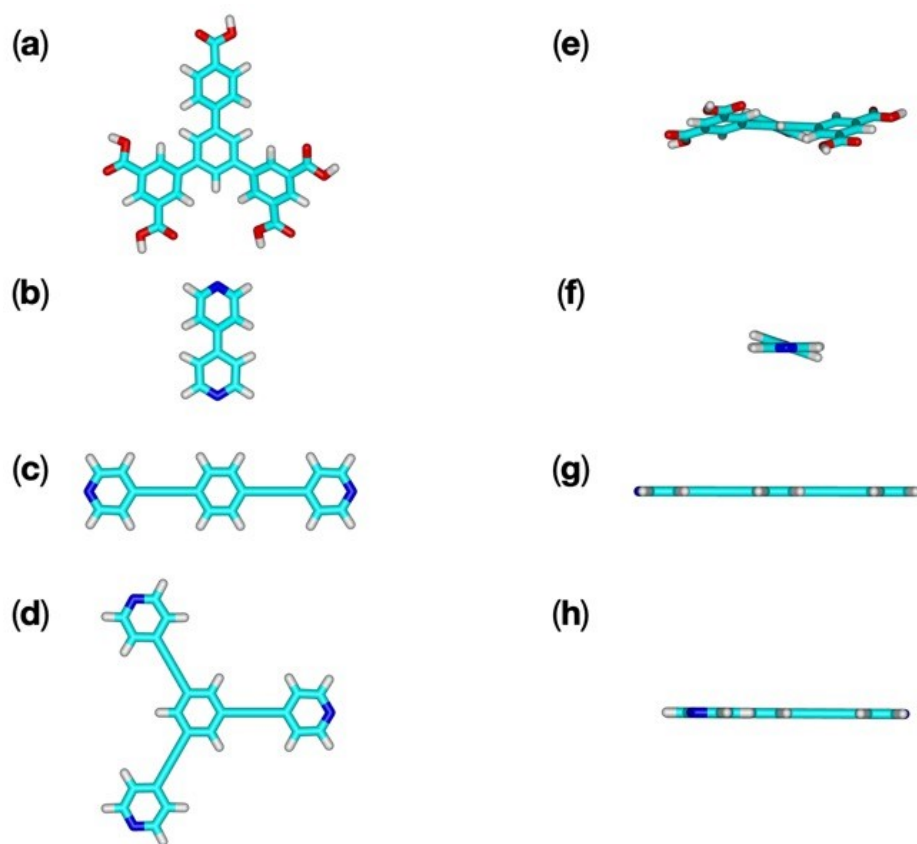

**Fig. S1** DFT simulated molecular models in the gas phase. (a-d) Top view of H<sub>5</sub>BHB, BPD, BPDYB, TPDYB respectively. (e-h) Side view of H<sub>5</sub>BHB, BPD, BPDYB, TPDYB, respectively.

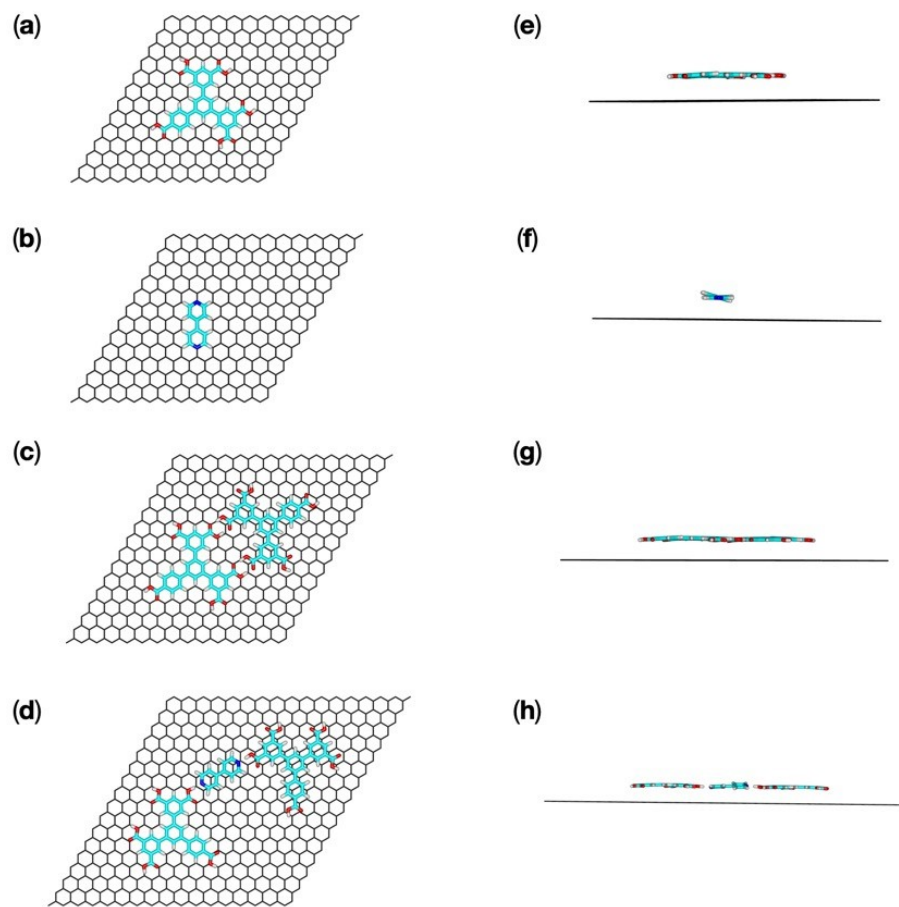

**Fig. S2** DFT simulated molecular models on the graphite surface. (a-d) Top view of H<sub>5</sub>BHB, BPD, H<sub>5</sub>BHB dimer, H<sub>5</sub>BHB-BPD unit cell, respectively. (e-h) Side view of H<sub>5</sub>BHB, BPD, H<sub>5</sub>BHB dimer, H<sub>5</sub>BHB-BPD unit cell, respectively.

2 Supplementary examples of pyridine molecules co-assembled with H<sub>5</sub>BHB.

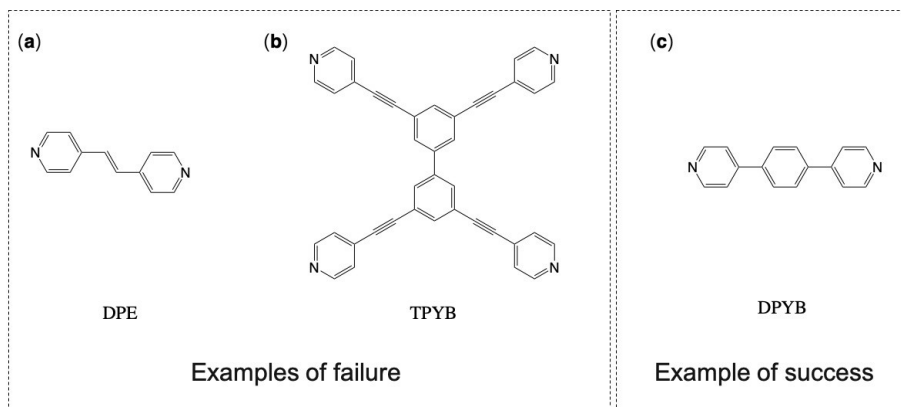

**Fig. S3** Supplementary failure and success examples of pyridine molecules that can form stable ordered co-assembled structure with H<sub>5</sub>BHB molecule. Failure examples: (a) 1,2-Di(4-pyridyl)ethylene (DPE). (b) 3,3',5,5'-Tetrakis(pyridin-4-ylethynyl)-1,1'-biphenyl (TPYB). Success example: (c) 1,4-Di(pyridin-4-yl)benzene (DPYB).

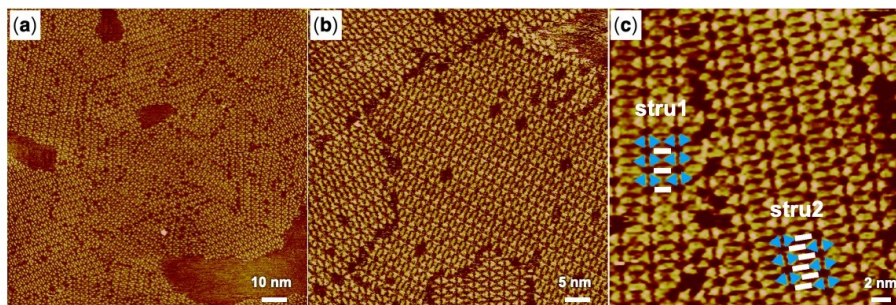

**Fig. S4** STM images of supplementary experiment: H<sub>5</sub>BHB co-assembled with DPYB at heptanoic acid–HOPG liquid–solid interface. (a) Large scale (120 nm × 120 nm) STM image,  $I_{set} = 311.3$  pA,  $V_{bias} = 686.6$  mV. (b) Large scale (60 nm × 60 nm) STM image,  $I_{set} = 152.6$  pA,  $V_{bias} = 1024$  mV. (c) High-resolution STM image (30 nm × 30 nm),  $I_{set} = 158.7$  pA,  $V_{bias} = 904.8$  mV. Two different co-assembled structures were observed, labeled with stru1 and stru2, respectively. The blue triangle shape represents for a H<sub>5</sub>BHB molecule, while the white rod shape represents for a DPYB molecule. The co-assembly behavior of H<sub>5</sub>BHB and DPYB was similar to that of H<sub>5</sub>BHB and BPDYB.

3 Supplementary large scale (120 nm × 120 nm) STM images.

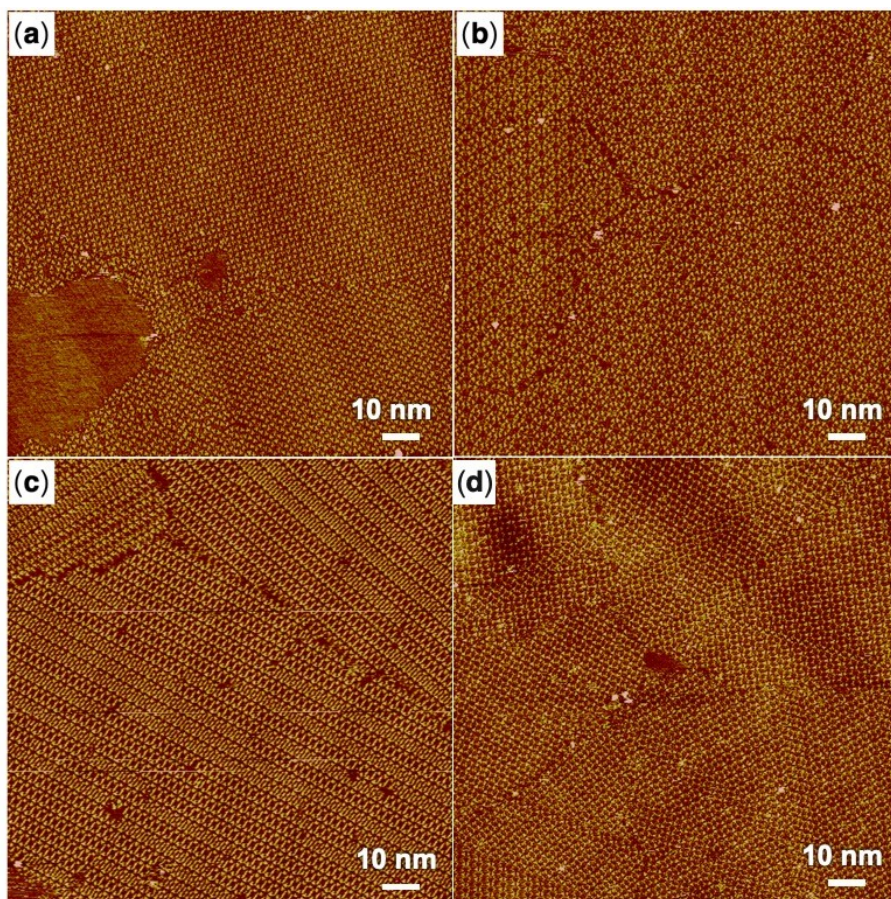

**Fig. S5** Supplementary large scale (120 nm × 120 nm) STM images at the heptanoic acid–HOPG liquid–solid interface of (a) H<sub>5</sub>BHB\_self-assembled,  $I_{\text{set}} = 231.9$  pA,  $V_{\text{bias}} = 815.4$  mV. (b) H<sub>5</sub>BHB–BPD co-assembled structure,  $I_{\text{set}} = 146.5$  pA,  $V_{\text{bias}} = 932.0$  mV. (c) H<sub>5</sub>BHB–BPDYB co-assembled structure,  $I_{\text{set}} = 177.9$  pA,  $V_{\text{bias}} = 932.3$  mV. (d) H<sub>5</sub>BHB–TPDYB co-assembled structure,  $I_{\text{set}} = 164.8$  pA,  $V_{\text{bias}} = 941.8$  mV.
